# Supplementary material
Source: MDPI journal article supplement (https://www.mdpi.com/2073-4433/12/10/1300)
Supplement: s1 [file s1]

# Supplementary Materials:

Tianchu Zhang, Yangfan Chen, Rongtai Tan, Xiaohong Xu\*

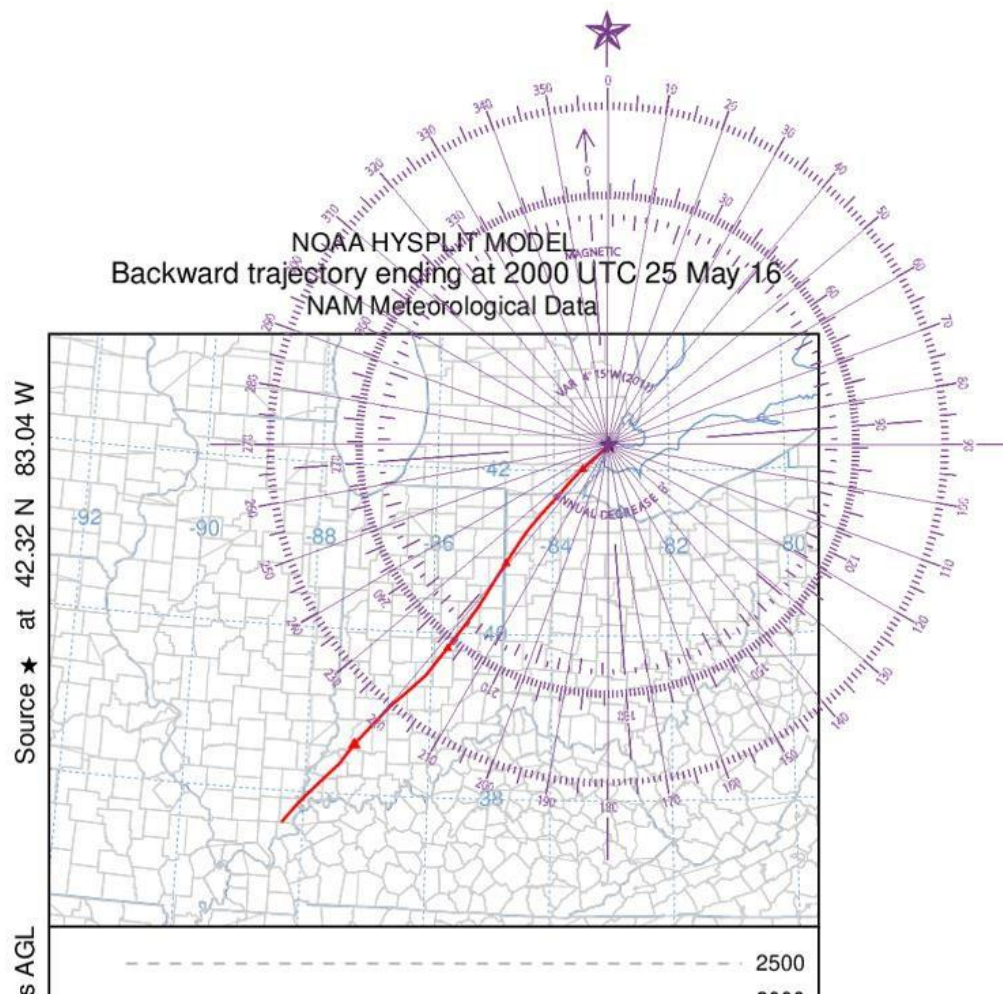

**Figure S1.** Example of air trajectory direction measurement. The start is Windsor. The direction is recorded as 220 degrees.

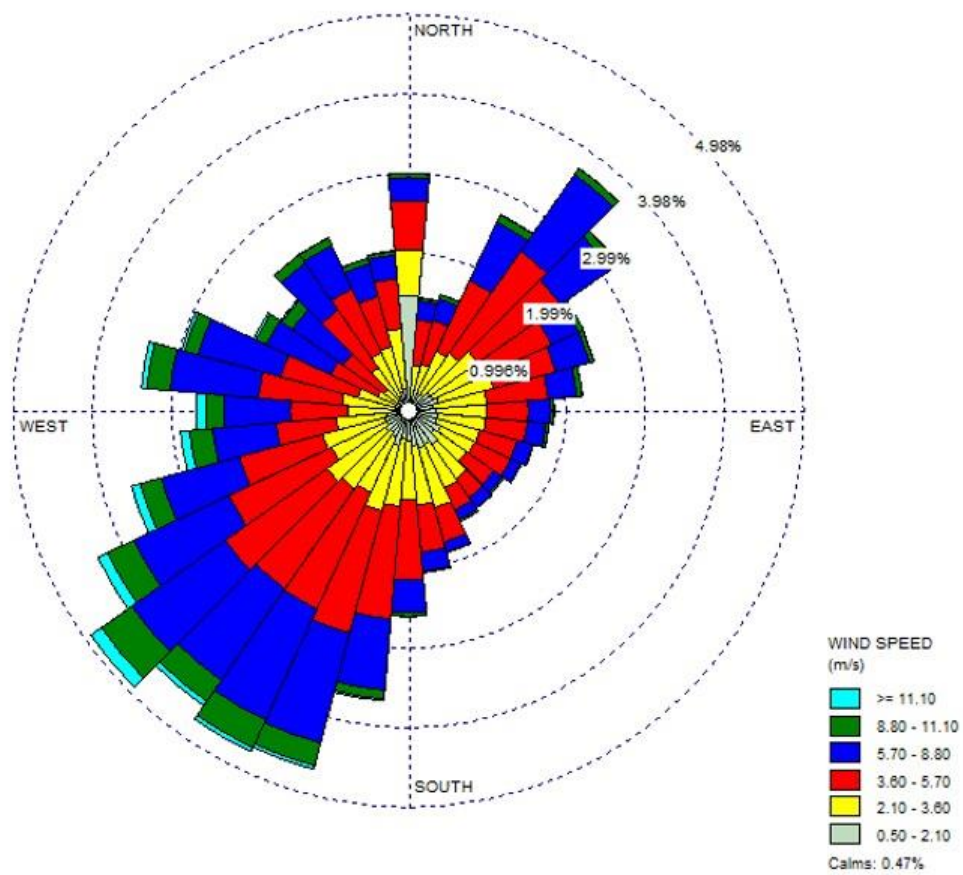

Figure S2. Wind rose at Windsor 2016-2019.
